# Supplementary material
Source: HighWire-hosted journal article supplement (https://www.rcpjournals.org/highwire/filestream/11677/field_highwire_adjunct_files/0/Collins_supplementary_material_S1.pdf)
Supplement: Collins_supplementary_material_S1.pdf [file Collins_supplementary_material_S1.pdf]

Sample daily message:

Hi everyone,

Thanks to Dr X (renal SpR) for delivering last night's webinar on AKI and presenting the latest trust guideline.

Here's the link to the recording. It's only half an hour long, and definitely worth a watch if you have some spare time: [LINK]

If you attended or watch the recording, please fill out this feedback form: [LINK]

**Awake Proning**

A new trust guideline on awake proning in covid-19 has been produced by some of the ITU team, which is available on the intranet (search for 'awake'). Here's a link to the pdf: [LINK]

They've also created a short video to show the process: [LINK]

**Case Based Discussion**

Wednesday 22nd April (tomorrow), 6pm

Tomorrow, Dr Y (O&G reg, QEH) and Dr Z (Anaesthetic reg, QEH) will be discussing a case of severe COVID in a pregnant patient. This interactive session will talk us through her management and I'm sure has lots of interesting learning points.

The Zoom link will be posted here just before it starts.

**Wellbeing corner**

The QEH anaesthetic consultants have set up a LGT wellness website. It contains lots of great links, and is also very pretty. Check it out here: [LINK]

**Quote of the Day**

'Just keep swimming' Dory, Finding Nemo

Your COVID Education Team
